1

2 **West Nile Virus Subverts T Cell Stimulatory Capacity of**  
3 **Human Dendritic Cells**

4 Matthew G. Zimmerman<sup>1,2,§</sup>, James R. Bowen<sup>1,2,§</sup>, Circe E. McDonald<sup>1,2</sup>, Bali  
5 Pulendran<sup>2,3</sup>, Mehul S. Suthar<sup>1,2,\*</sup>

6

7 <sup>1</sup>Department of Pediatrics, Division of Infectious Diseases, Emory University School of  
8 Medicine, Atlanta, GA 30322, USA.

9 <sup>2</sup>Emory Vaccine Center, Yerkes National Primate Research Center, Atlanta, GA 30329,  
10 USA.

11 <sup>3</sup>Department of Pathology and Laboratory Medicine, Emory University School of  
12 Medicine, Atlanta, GA 30329, USA

13 <sup>§</sup>These authors contributed equally to this work

14 \*Correspondence: [msuthar@emory.edu](mailto:msuthar@emory.edu) (M.S.S.)

15 **Abstract**

16 West Nile virus (WNV) is a neurotropic flavivirus and the leading cause of mosquito-  
17 borne encephalitis in the United States. Recent studies in humans have found that  
18 dysfunctional T cell responses strongly correlate with development of severe WNV  
19 neuroinvasive disease. However, the contributions of human dendritic cells (DCs) in  
20 priming WNV-specific T cell immunity remains poorly understood. Here, we  
21 demonstrate that human monocyte-derived DCs (moDCs) support productive viral  
22 replication following infection with a pathogenic strain of WNV. Antiviral effector gene  
23 transcription was strongly induced during the log-phase viral growth, while secretion of  
24 type I interferons (IFN) occurred with delayed kinetics. Activation of RIG-I like receptor  
25 (RLR) or type I IFN signaling prior to log-phase viral growth significantly diminished viral  
26 replication, suggesting that activation of antiviral programs early can block WNV  
27 infection. In contrast to the induction of antiviral responses, WNV infection did not  
28 promote transcription or secretion of pro-inflammatory (IL-6, GM-CSF, CCL3, CCL5,  
29 CXCL9) or T cell modulatory cytokines (IL-4, IL-12, IL-15). There was also minimal  
30 induction of molecules associated with antigen presentation and T cell priming,  
31 including the co-stimulatory molecules CD80, CD86, and CD40. Functionally, WNV-  
32 infected moDCs dampened allogenic CD4 and CD8 T cell activation and proliferation.  
33 Combined, we propose a model where WNV subverts human DC activation to  
34 compromise priming of WNV-specific T cell immunity.

35

36

37

38

39 **Importance**

40 West Nile virus (WNV) is an encephalitic flavivirus that remains endemic in the  
41 United States. Previous studies have found dysfunctional T cell responses correlate to  
42 severe disease outcomes during human WNV infection. Here, we sought to better  
43 understand the ability of WNV to program human dendritic cells (DCs) to prime WNV-  
44 specific T cell responses. While productive infection of monocyte-derived DCs activated  
45 antiviral and type I interferon responses, molecules associated with inflammation and  
46 programming of T cells were minimally induced. Functionally, WNV-infected DCs  
47 dampened T cell activation and proliferation during an allogeneic response. Combined,  
48 our data supports a model where WNV infection of human DCs compromises WNV-  
49 specific T cell immunity.

## 50 **Introduction**

51 West Nile virus (WNV) is a neurotropic flavivirus that remains the leading cause  
52 of mosquito-borne encephalitis in the United States (1). It is estimated that upwards of 6  
53 million people have been infected by WNV in the US since its introduction in 1999,  
54 leading to over a thousand cases of neuroinvasive disease and nearly a hundred deaths  
55 each year (2). Following the bite of an infected mosquito, approximately 20% of  
56 individuals present with clinical outcomes ranging from mild febrile illness to severe  
57 neuroinvasive disease. Neuroinvasion is a serious complication with long term sequelae  
58 that includes ocular involvement, cognitive impairment, muscle weakness, and flaccid  
59 paralysis (3). The continued public health threat and lack of FDA-approved vaccines or  
60 specific therapeutics against WNV underpins the need to better understand the  
61 mechanisms of protective immunity during human infection.

62 The pathogenesis of human WNV infection is incompletely understood, although  
63 excellent mouse models have illuminated mechanisms of virus-induced encephalitis and  
64 critical features of immune control (4). The bite of an infected mosquito delivers high  
65 doses of WNV into the skin where keratinocytes, Langerhans cells, and dermal dendritic  
66 cells (DCs) are believed to be initial target cells of infection (5, 6). Over the next 24  
67 hours, WNV migrates to the skin draining lymph nodes and replicates within resident  
68 DCs. Subsequent viremia promotes peripheral seeding of virus into permissive tissues  
69 such as the spleen, where DCs are targeted for infection (7). WNV then crosses the  
70 blood brain barrier and infects neurons within the central nervous system (CNS),  
71 leading to viral encephalitis. Restriction of viral replication by DCs during the early,

72 peripheral phases of viral replication has been shown to be critical for limiting  
73 neuroinvasion and mitigating viral encephalitis (7, 8).

74 Within murine DCs, detection of WNV occurs primarily through the concerted  
75 efforts of RIG-I and MDA5 (9, 10), members of the retinoic acid inducible gene I (RIG-I)  
76 like receptor (RLR) family of cytosolic pattern recognition receptors. Signal transduction  
77 through the adaptor protein mitochondrial antiviral signaling (MAVS) triggers the nuclear  
78 factor- $\kappa$ B (NF $\kappa$ B) and interferon regulatory factor (IRF)-3, 5, and 7 dependent induction  
79 of type I interferon (IFN) and antiviral effector gene transcription (8). Following the  
80 MAVS-dependent secretion of type I IFN (10), signaling through the type I IFN receptor  
81 on DCs is required for early virus restriction and host survival (7).

82 In addition to direct restriction of viral replication, DCs are critical for the  
83 programming of antiviral CD8<sup>+</sup> T cell responses that are required for clearance of WNV  
84 from the peripheral tissues and CNS (11). In humans, analysis of CD4<sup>+</sup> and CD8<sup>+</sup> T  
85 cells from the blood of WNV-infected patients has found dysfunctional T cell responses  
86 correlate with symptomatic disease outcome (12, 13). Decreased frequencies of CD4<sup>+</sup>  
87 regulatory T cells also correlates with symptomatic WNV infection, highlighting the  
88 importance of a balanced T cell response (14). However, the contributions of human  
89 DCs in programming T cell immunity during human WNV infection remains poorly  
90 understood.

91 Here, we utilized primary human cells to demonstrate that WNV productively  
92 replicates within monocyte-derived DCs. Log-phase viral replication corresponded with  
93 induction of type I IFN and antiviral effector genes, with more delayed secretion of IFN $\alpha$   
94 and IFN $\beta$  proteins. Activation of RLR or type I IFN signaling restricted viral replication,

95 with RLR signaling remaining effective even after blockade of signaling through the type  
96 I IFN receptor. In contrast, WNV infection failed to up-regulate molecules involved in  
97 promoting inflammatory responses and priming of T cell immunity. Functionally,  
98 impaired DC activation resulted in diminished T cell proliferation by WNV-infected  
99 moDCs during an allogeneic response. Combined, WNV infection of human DCs  
100 activated antiviral responses while failing to program DCs to effectively prime WNV-  
101 specific T cell immunity.

102

## 103 **Results**

### 104 **WNV productively infects human DCs**

105 While DCs are an important cell type during infection with multiple flaviviruses,  
106 their contributions during human WNV infection remains limited. To model viral  
107 replication in human DCs, monocyte-derived DCs (moDCs) were generated from  
108 peripheral blood CD14<sup>+</sup> monocytes and infected with a pathogenic strain of WNV (15).  
109 Viral replication was first detected at 12hpi, as noted by increased viral RNA synthesis  
110 **(Fig. 1A)**. Viral RNA levels continued to increase exponentially over the next 36hrs.  
111 Consistent with genome replication kinetics, release of infectious virus increased  
112 exponentially between 12 and 24hpi and plateaued at 48hpi **(Fig. 1B)**. Next, infected  
113 populations of moDCs were stained for intracellular expression of a structural protein  
114 found within the virus envelope (viral E protein) (16). Corresponding with log phase viral  
115 growth, the percentage of infected cells increased exponentially between 12 and 24hpi  
116 **(Fig. 1C)**. Infection plateaued between 24 and 48hpi, reaching upwards of 50% of cells  
117 positive for viral E protein. E protein expression was not observed in mock or UV

118 inactivated virus infection controls. ImageStream analysis revealed that WNV E protein  
119 was localized predominantly within the cytoplasm and did not co-localize with the cell  
120 surface marker CD11c or the nucleus (**Fig. 1D**). Declining percent infection at 72hpi  
121 corresponded with significant loss of cell viability (**Fig. 1E**). Combined, three  
122 complementary measures of viral replication (viral RNA, infectious virus release, and  
123 viral E protein staining) confirm that human moDCs are productively infected by WNV  
124 with log phase viral growth beginning between 12 and 24hpi.

125

### 126 **Innate immune signaling restricts WNV replication.**

127       Type I IFN within dendritic cells is critical for mediating protection against lethal  
128 infection outcome and controlling flavivirus replication (17, 18). We next determined the  
129 ability of both the RLR and type I IFN signaling pathways to restrict WNV infection of  
130 moDCs. We infected moDCs with WNV (MOI 10), treated cells with either a RIG-I  
131 agonist, MDA5 agonist, or IFN $\beta$  at 1 hpi and virus replication was measured at 24 hpi.  
132 We triggered RIG-I using a previously characterized and highly-specific agonist derived  
133 from the 3' UTR of hepatitis C virus (19) and triggered MDA5 using high molecular  
134 weight poly(I:C), which preferentially activates MDA5 signaling upon delivery into the  
135 cytoplasm (20). Stimulation of RIG-I, MDA5, or IFN- $\beta$  signaling potently restricted viral  
136 replication, with greater than 90% inhibition as measured by both viral burden in the  
137 supernatant and frequency of infected cells (**Fig. 2A**). To confirm the role of type I IFN,  
138 we infected moDCs in the presence of an IFNAR2 blocking antibody and observed no  
139 effect on viral replication through 24 hpi, however, late viral control was compromised  
140 as shown by a 3-fold increase in the frequency of infected cells and a log-fold increase

141 in viral replication at 48 hpi (**Fig. 2B**). Notably, blocking type I IFN signaling in the  
142 presence of either RIG-I or MDA5 agonists still reduced viral replication, although we  
143 did observe a slight reduction in the efficiency of MDA5 signaling to reduce WNV  
144 infection in the presence of an anti-IFNAR2 neutralizing antibody (**Fig. 2C**) (21)  
145 Combined, these findings demonstrate that RIG-I, MDA5 and type I IFN signaling can  
146 efficiently block WNV replication in human DCs.

147

### 148 **WNV induces antiviral and type I IFN responses in human DCs**

149 Traditional studies of antiviral responses have predominantly relied on  
150 approaches involving genetic ablation, gene knockdown, or gene overexpression  
151 methodologies (22). While useful, these approaches remain difficult to perform in  
152 primary human cells and may not accurately reflect the role of a given molecule during  
153 the normal course of infection. To overcome these limitations, we employed a systems  
154 biology approach to assess the antiviral landscape during WNV infection in human DCs  
155 (**Fig. 3A**). We generated moDCs from 5 donors and performed messenger RNA  
156 sequencing following innate immune agonist treatment or infection with WNV. To study  
157 the early antiviral response during WNV infection, transcriptional responses were  
158 measured preceding (12 hpi) and during (24 hpi) log phase viral replication (**Fig. 1**).  
159 Using weighted gene co-expression network analysis (WGCNA), we defined molecular  
160 signatures following stimulation of RIG-I, MDA5, or IFN $\beta$  signaling, identifying six  
161 clusters of co-expressed genes, or modules (**Fig. 3B**) (23). The module with the largest  
162 gene membership, module 5 (M5), was enriched for genes associated with the biologic  
163 process of “Defense response to virus”. Module 6 was also enriched for immune



164 response related genes, while the remaining four modules were enriched for genes  
165 involved in biosynthetic processes, cellular metabolism, and stress responses. Given  
166 the large gene number and enrichment for antiviral response pathways, we focused our  
167 analyses on the M5 module.

168 We next identified differentially expressed genes (DEGs) within the M5 module  
169 for each treatment condition, as compared to time-matched untreated and uninfected  
170 cells (>2-fold change, significance of  $p < 0.01$ ). RIG-I agonist treated cells induced a  
171 greater number of M5-related genes as compared to either MDA5 or IFN $\beta$  treated cells.  
172 In contrast, gene expression within the M5 module during WNV infection was temporally  
173 controlled: minimal gene expression at 12 hpi with more robust gene expression by 24  
174 hpi (**Fig. 3C**). MetaCore pathways enrichment analysis of the M5 DEGs revealed four  
175 significantly enriched pathways including “IFN alpha/beta signaling”, “Antiviral activation  
176 of interferons”, “Innate immune response to RNA virus infection” and “Role of PKR in  
177 stress-induced antiviral cell response” (**Fig. 3D**). The expression patterns of host  
178 defense transcription factors, PRR signaling molecules, and antiviral effector genes  
179 were largely similar between the RIG-I agonist, poly(I:C), and IFN $\beta$ -treated DCs at  
180 12hrs post stimulation, suggesting that upregulation of these genes are largely  
181 mediated through type I IFN signaling (**Fig. 4A**). Notably, WNV-infected DCs displayed  
182 minimal differentially expressed genes at 12hpi, however at 24hpi numerous antiviral  
183 effectors (e.g. *IFIT1*, *IFIT2*, *IFIT3*, *RSAD2*, *OASL*), molecules involved in RNA virus  
184 sensing (e.g. *DDX58*, *IFIH1*, *PKR*, *TLR3*), and the antiviral transcription factor *IRF7*  
185 were significantly up-regulated. Molecules involved in type I IFN signaling were also not  
186 induced at 12hpi but showed significant enrichment at 24hpi (**Fig. 4B**). Despite

187 enrichment of type I IFN genes at 24hpi, secretion of IFN $\alpha$  and IFN $\beta$  protein was not  
188 detected until 48hpi. The lack of detectable IFN $\alpha$  or IFN $\beta$  protein secretion until 48 hpi in  
189 human DCs is consistent with the significant increase in viral replication observed at 48  
190 hpi when type I IFN signaling was blocked in WNV-infected DCs with an anti-IFNAR2  
191 neutralizing antibody (**Fig. 2B**). Combined, our data demonstrates that WNV infection of  
192 human DCs induces notable antiviral gene expression and that type I IFN signaling  
193 plays a role in late, but not early, restriction of viral replication

194

## 195 **WNV infection fails to promote inflammatory and T cell modulatory cytokine** 196 **responses**

197 We next assessed the induction of inflammatory cytokine and chemokine  
198 responses, an important component of antiviral immunity, DC activation, immune cell  
199 recruitment, and T cell priming (24, 25). In contrast to type I IFN and antiviral effector  
200 responses, WNV infection promoted minimal transcriptional enrichment of multiple  
201 cytokines involved in inflammatory cytokine responses (e.g. IL-15, IL-7, and IL-27), and  
202 chemotaxis (e.g. CCL2, CCL3, CCL4, CCL5, and CXCL9) (**Fig. 5A**). *CXCR1*  
203 transcription was also selectively down-regulated during WNV infection. Importantly,  
204 RIG-I agonist treatment induced transcriptional expression of multiple inflammatory and  
205 T cell modulatory cytokines, confirming the ability of moDCs to mount pro-inflammatory  
206 responses upon innate immune stimulation. While RIG-I agonist induced inflammatory  
207 cytokines (IL-6 and GM-CSF), T cell promoting cytokines (IL-4, IL-15 and IL-12) and  
208 chemokines (CCL3, CCL5 and CXCL9), WNV-infected moDCs displayed little to no  
209 induction at the protein level of these cytokines/chemokines at 24 hpi (**Fig. 5B**). These

210 findings strongly suggest that WNV blocks the induction of proinflammatory  
211 cytokines/chemokines during infection.

212

213

#### 214 **WNV infection does not induce molecules involved in T cell priming**

215 In addition to the secretion of cytokines that modulate T cell responses, engagement of  
216 viral associated molecular patterns increases the surface expression of T cell co-  
217 signaling and MHC molecules on activated DCs (26). At the transcriptional level, WNV  
218 infection failed to induce multiple molecules associated with antigen presentation on  
219 MHC (*HLA-A*, *ERAP1*), *LAMP3* (27), proteasome subunits (*PSME1*, *PSMA2*, *PSMA4*,  
220 *PSMB10*), and *CD1D* (28) (**Fig. 6A**). WNV also failed to significantly up-regulate genes  
221 involved in T cell co-signaling (e.g. *CD80*, *CD86*, *CD40*) and selectively up-regulated  
222 expression of galectin-9 (*LGALS9*), a ligand for the T cell inhibitory receptor TIM3 (12).  
223 These findings were biologically validated by flow cytometry, where WNV infection did  
224 not up-regulate cell surface levels of CD80, CD86, CD40 or MHC class II proteins within  
225 E protein+ cells at 24hpi or 48hpi (**Fig. 6B**). Notably, high levels of WNV infection (MOI  
226 100) still failed to induce expression of costimulatory and MHC class II molecules (**Fig.**  
227 **6C**). In contrast to WNV infection, RIG-I agonist significantly up-regulated transcription  
228 of multiple molecules involved in antigen presentation and T cell co-signaling,  
229 corresponding with increased cell surface expression of CD80, CD86, CD40, and MHC  
230 II proteins. Combined, while WNV infection induces type I IFN and antiviral effector  
231 responses, WNV-infected DCs are compromised in their ability to induce inflammatory

232 and chemotactic mediators important for immune activation, as well as antigen  
233 presentation and co-stimulatory molecules required for optimal T cell priming.

234

235

236

### 237 **WNV-infected DCs dampen allogenic T cell proliferation**

238 To determine if the minimal DC activation induced during WNV infection impairs T cell  
239 proliferation, we assessed the capacity of WNV-infected moDCs to drive an allogeneic T  
240 cell response. Uninfected moDCs induced notable activation of donor mismatched CD4  
241 and CD8 T cells in a DC:T cell ratio dependent manner, as indicated by increased  
242 expression of the human T cell activation markers CD38 and HLA-DR (29) (**Fig. 7A**).  
243 Allogenic activation of T cells corresponded with proliferation of upwards of 40% of CD4  
244 and CD8 T cells in a DC:T cell ratio dependent manner (**Fig. 7B**). In contrast, WNV  
245 infected moDCs diminished allogeneic CD4 and CD8 T cell activation, corresponding  
246 with significantly lower percentages of CD38<sup>+</sup> HLA-DR<sup>+</sup> and proliferated T cells.  
247 Combined, our data suggests that WNV infection induces minimal enrichment of  
248 molecules involved in DC activation, resulting in impaired T cell proliferation.

249

### 250 **Discussion**

251 In this study, we combined virologic and immunologic measures with  
252 transcriptomic analysis to better understand antiviral responses during WNV infection in  
253 primary human DCs. WNV productively infected human moDCs and induced cell death,  
254 coinciding with declining viral growth kinetics. RIG-I, MDA5, and IFN $\beta$  signaling potently

255 restricted viral replication, corresponding with strong activation of antiviral defense  
256 response genes. In contrast, there was minimal up-regulation of inflammatory mediators  
257 or molecules involved in T cell priming. Functionally, WNV-infected moDCs promoted  
258 impaired allogeneic T cell proliferation and activation.

259         Studies in mice have found that RLR and type I IFN signaling are critical for viral  
260 restriction and host survival during WNV infection, however, the contributions of innate  
261 immune signaling during infection of human cells remains limited (7, 30). Here, we  
262 demonstrated that RIG-I, MDA5, and IFN $\beta$  signaling potently restrict WNV replication  
263 through induction of strong antiviral gene transcription, suggesting that similar to mice,  
264 RLR and type I IFN signaling are important for viral control during human WNV  
265 infection. RIG-I and MDA5 agonists also remained efficient in blocking WNV replication  
266 independent of type I IFN signaling, consistent with the ability of RLR signaling to  
267 induce antiviral gene expression in the absence of the type I IFN receptor in mice (30).  
268 Combined, our results confirm the importance of RLR and type I IFN signaling in the  
269 induction of antiviral responses and restriction of viral replication within primary human  
270 DCs.

271         These findings are similar to previous work, where WNV infection also failed to  
272 induce inflammatory cytokine secretion (31). Infection of moDCs with a non-pathogenic  
273 WNV isolate, WNV Kunjin, also induced minimal production of IL-12, despite notable  
274 up-regulation of both CD86 and CD40 (28). This suggests that an inability to induce  
275 inflammatory cytokine responses may be shared among WNV strains, while pathogenic  
276 strains have evolved unique mechanisms to subvert antigen presentation and T cell  
277 activation. The failure of WNV to activate human moDCs is also similar to our recent

278 work with ZIKV (32). In contrast to WNV and ZIKV, infection of moDCs with the yellow  
279 fever virus vaccine strain (YFV-17D) up-regulates multiple inflammatory mediators and  
280 surface expression of CD80 and CD86 (26). The ability of YFV-17D to induce strong DC  
281 activation may reflect the loss of a viral antagonist during the attenuation process,  
282 similar to the ability of WNV Kunjin to induce up-regulation of CD86 and CD40 (28).  
283 Alternatively, the ability of YFV-17D to induce DC activation may be an inherent  
284 property of certain flaviviruses. Indeed, DENV has also been found to activate  
285 inflammatory responses and up-regulate co-stimulatory molecules following infection  
286 (33, 34). Altogether, our recent studies may suggest that certain neurotropic flaviviruses  
287 are particularly adept at subverting DC:T cell signaling.

288         Due to the largely subclinical presentation of WNV infection in humans,  
289 understanding genetic correlates of susceptibility and viral restriction remains  
290 exceedingly difficult. However, modeling WNV infection in mice lacks the genetic  
291 variation seen within outbred human populations. To combat this issue, the  
292 collaborative cross (CC) mouse model system, recombinant inbred mice containing  
293 genetic diversity from eight founder mouse strains, has been recently developed to  
294 study host antiviral responses within a genetically diverse population (35). Using the CC  
295 mouse system, one group observed increased regulatory T cells (Tregs) infiltration and  
296 no immunopathology in the brains of asymptomatic WNV-infected mice (36). This  
297 corroborated well to earlier human studies showing that increased levels of Tregs  
298 correlated to improved outcomes during WNV infection (14). These studies have  
299 focused largely on observing WNV-specific T and B cell responses to in the CC model  
300 system; however, the effects of these diverse polymorphisms on DC function during

301 WNV infection remains largely untouched. Similar to our current study in human  
302 moDCs, transcriptomic analyses from whole spleens and brains of WNV-infected CC  
303 mice have also shown differences in antigen presentation, T cell signaling, and  
304 inflammatory cytokine production (37, 38). Altogether, the CC mouse system can be  
305 utilized in future studies to recapitulate human disease and understand DC responses  
306 during WNV infection.

307 An important observation of our study was that WNV infection did not trigger DC  
308 activation, as determined by upregulation of costimulatory protein expression. Through  
309 an allogeneic T cell assay, we found that WNV-infected moDCs were less efficient with  
310 inducing CD4+ and CD8+ T cell proliferation as compared to mock-infected moDCs.  
311 WNV-specific T cell responses have been detected in both symptomatic and  
312 asymptomatic WNV infection in humans (39). However, quality rather than quantity of  
313 the CD4+ and CD8+ T cell responses during WNV infection is an important predictor of  
314 symptomatic infection outcome. Dysregulated Th1 CD4+ T cell responses were found to  
315 strongly correlate with neuroinvasive disease (13). Additionally, decreased numbers of  
316 regulatory T cells have also been implicated in symptomatic and neuroinvasive infection  
317 in WNV-infected individuals, suggesting that immunomodulation of WNV-specific T cells  
318 responses are essential for avoiding immunopathology (14). Lastly, a recent study  
319 linked expression of the inhibitory T cell receptor Tim-3 on T cells with progression to  
320 symptomatic disease outcome (12). Combined, these findings demonstrate that  
321 development of an effective T cell response is critical for modulating infection outcome  
322 (symptomatic vs asymptomatic) during WNV infection. Our studies have now  
323 determined that WNV interferes with DC activation, through inhibition of costimulatory

324 molecule expression and pro-inflammatory cytokine production, which can lead to  
325 dysregulated T cell responses, immunopathology and excessive neuronal injury.

326 In summary, our systems biology approach defined the antiviral landscape seen  
327 during RLR and type I IFN signaling as well as WNV infection in human DCs. Through  
328 our study, we observed that WNV can downregulate numerous genes responsible for  
329 establishing proper WNV-specific adaptive immune responses in human DCs,  
330 negatively affecting proper CD4+ and CD8+ T cell responses. Altogether, our study  
331 significantly advances our understanding of how WNV disrupts antiviral immunity during  
332 human infection.

333

## 334 **Materials and Methods**

335 **Ethics statement.** Human peripheral blood mononuclear cells (PBMCs) were obtained  
336 from de-identified healthy adult blood donors and processed immediately. All individuals  
337 who participated in this study provided informed consent in writing in accordance to the  
338 protocol approved by the Institutional Review Board of Emory University,  
339 IRB#00045821, entitled “Phlebotomy of healthy adults for the purpose of evaluation and  
340 validation of immune response assays”.

341

342 **Viruses.** WNV stocks were generated from an infectious clone, WNV isolate TX 2002-  
343 HC, and passaged once in Vero cells, as previously described (15). WNV stocks were  
344 titrated on Vero cells by plaque assay. moDCs were infected with WNV at MOI 10 for  
345 1hr at 37°C in cRPMI (without GM-CSF or IL-4). After 1hr, virus was washed off, cells  
346 were resuspended in fresh cRPMI, and incubated at 37°C for 3-72 hours.



347

348 **Cell lines.** Vero cells (WHO Reference Cell Banks) were maintained in complete  
349 DMEM. Complete DMEM was prepared as follows: DMEM medium (Corning)  
350 supplemented with 10% fetal bovine serum (Optima, Atlanta Biologics), 2mM L-  
351 Glutamine (Corning), 1mM HEPES (Corning), 1mM sodium pyruvate (Corning), 1x MEM  
352 Non-essential Amino Acids (Corning), and 1x Antibiotics/Antimycotics (Corning).  
353 Complete RPMI was prepared as follows: cRPMI; RPMI 1640 medium (Corning)  
354 supplemented with 10% fetal bovine serum (Optima, Atlanta Biologics), 2mM L-  
355 Glutamine (Corning), 1mM Sodium Pyruvate (Corning), 1x MEM Non-essential Amino  
356 Acids (Corning), and 1x Antibiotics/Antimycotics (Corning).

357

358 **Generation of monocyte derived dendritic cells.** To generate human moDCs, CD14+  
359 monocytes were differentiated in cRPMI supplemented with 100ng/mL of GM-CSF and  
360 IL-4 for 5-6 days, as previously described (32). In brief, freshly isolated PBMCs obtained  
361 from healthy donor peripheral blood (lymphocyte separation media; StemCell  
362 Technologies) were subjected to CD14+ magnetic bead positive selection using the  
363 MojoSort Human CD14 Selection Kit (BioLegend). Purified CD14+ monocytes were  
364 cultured in complete RPMI supplemented with 100ng/mL each of recombinant human  
365 IL-4 and GM-CSF (PeproTech) at a cell density of 2e6 cells/mL. After 24hr of culture,  
366 media and non-adherent cells were removed and replaced with fresh media and  
367 cytokines. Suspension cells (“moDCs”) were harvested after 5-6 days of culture and  
368 were consistently CD14-, CD11c+, HLA-DR+, DC-SIGN+, and CD1a+ by flow

369 cytometry. For experimentation, moDCs were maintained in complete RPMI without  
370 GM-CSF or IL-4.

371

372 **Quantitative reverse transcription-PCR (qRT-PCR).** Total RNA was purified (Quick-  
373 RNA MiniPrep Kit; Zymo Research) and viral RNA was reverse transcribed (High  
374 Capacity cDNA Kit; Applied Biosystems) using 1 pmol of a GVA tagged (underlined)  
375 primer (5'-

376 TTTGCTAGCTTTAGGACCTACTATATCTACCTGGGTCAGCACGTTTGTCATTG-3')

377 directed against the E gene (18, 40). Reverse transcribed viral sequences were  
378 detected by qRT-PCR (TaqMan Gene Expression Master Mix; Applied Biosystems)  
379 using 10 pmol of primers (5'-TTTGCTAGCTTTAGGACCTACTATATCTACCT3' and 5'-  
380 TCAGCGATCTCTCCACCAAAG-3') and 2.5 pmol of hydrolysis probe (5'-FAM-  
381 TGCCCGACCATGGGAGAAGCTC-3IABkFQ-3'). All custom primers and probes were  
382 obtained from Integrated DNA Technologies. All qRT-PCR was normalized to the  
383 amount of GAPDH (Hs02758991\_g1; Applied Biosystems) in each respective sample.

384

385 **Quantitation of infectious virus.** Infectious virus was quantitated using a plaque assay  
386 on Vero cells with a 1% agarose overlay and crystal violet counterstain, as previously  
387 described (15).

388

389 **Innate immune agonists.** To stimulate RIG-I signaling, 100ng of RIG-I agonist derived  
390 from the 3'-UTR of hepatitis C virus (19) was transfected per 1e6 cells using TransIT-  
391 mRNA transfection kit (Mirus). For stimulation of MDA5 signaling, 100ng of high

392 molecular weight poly-(I:C) was transfected per 1e6 cells using LyoVec transfection  
393 reagent (Invivogen). To stimulate type I IFN signaling, cells were incubated with 100  
394 IU/mL of human recombinant IFN $\beta$ . In select experiments, different doses of agonists  
395 were used and this is indicated within the respective figure legend. To inhibit type I IFN  
396 signaling, 5 $\mu$ g/mL anti-human Interferon- $\alpha/\beta$  Receptor Chain 2 (MMHAR-2; EMD  
397 Milipore) blocking monoclonal antibody was used.

398 **RNA sequencing and bioinformatics.** moDCs were generated from 5 donors and  
399 either treated with innate immune agonists for 12hr (RIG-I, MDA5, or IFN $\beta$ ) or infected  
400 with WNV (12hpi and 24hpi). Total RNA was purified (Quick-RNA MiniPrep Kit; Zymo  
401 Research) and mRNA sequencing libraries were prepared for RNA sequencing (Illumina  
402 TruSeq chemistry). RNA sequencing was performed on a Illumina HiSeq 2500 System  
403 (100bp single end reads). Sequencing reads were mapped to the human reference  
404 genome 38. Reads were normalized and differential expression analysis performed  
405 using DESeq2 (41). Differentially expressed genes were determined by 2-fold change  
406 and  $P < 0.01$ . The raw data of all RNA sequencing will be deposited into the Gene  
407 Expression Omnibus (GEO) repository and the accession number will be available  
408 following acceptance of this manuscript. Weighted gene co-expression module analysis  
409 was performed on DESeq2 normalized mapped reads (TIBCO Spotfire with Integromics  
410 Version 7.0) from RIG-I agonist, MDA5 agonist, IFN $\beta$ , and mock treated samples. First,  
411 the datasets were reduced to focus the network analysis on the 5446 most variable  
412 genes (as determined by variation value greater than 1) using the Variance function in  
413 R. We constructed a signed weighted correlation network by generating a matrix  
414 pairwise correlation between all annotated gene pairs. The resulting biweight mid-

415 correlation matrix was transformed into an adjacency matrix using the soft thresholding  
416 power ( $\beta_1$ ) of 12. The adjacency matrix was used to define the topological overlap  
417 matrix (TOM) based on a dissimilarity measurement of 1- TO. Genes were hierarchically  
418 clustered using average linkage and modules were assigned using the dynamic tree-  
419 cutting algorithm (module eigengenes were merged if the pairwise calculation was  
420 larger than 0.75). This resulted in the construction of six modules.

421

422 **Flow cytometry.** Cells were prepared for analysis as previously described (32). In brief,  
423 cells were Fc receptor blocked for 10 min, stained for phenotypic and activation markers  
424 for 20 min, and viability stained for 20 min (Ghost Dye Violet 510, Tonbo Biosciences). For  
425 intracellular staining of WNV E protein, cells were fixed and permeabilized (Transcription  
426 Factor Staining Buffer Kit, Tonbo Biosciences) and labeled with E16-APC for 20min at room  
427 temperature (16). Flow cytometry data was analyzed using FlowJo version 10 software.  
428 ImageStream data was analyzed using the Amnis IDEAS software. For moDC studies, the  
429 following antibody clones from Biolegend were used: CD11c (B-Ly6), CD80 (2D10), CD86  
430 (IT2.2), CD40 (5C3), HLA-DR (G46-6; BD Bioscience), CD14 (M5E2), CD1a (HI149).

431 **T cell proliferation assay.** Freshly isolated PBMCs obtained from healthy donor  
432 peripheral blood (lymphocyte separation media; StemCell Technologies) were subjected  
433 to CD4 or CD8 T cell magnetic bead negative selection using the MojoSort Human CD4  
434 or CD8 Selection Kit (BioLegend). Isolated CD4 or CD8 T cells were labeled with  
435 CellTrace Violet (CTV) Cell Proliferation Kit (ThermoFisher) per the manufacturer's  
436 instructions. In a 96-well U bottom plate, CTV labeled CD4 or CD8 T cells ( $2 \times 10^5$  cells)  
437 were mixed with different ratios of either uninfected moDCs, or moDCs infected with

438 WNV for 24hr (1:4, 1:8, 1:16, 1:32, 1:64, and 1:128 DC:T cell ratios). To prevent  
439 spreading infection, we added anti-E16 neutralizing antibody at 5 $\mu$ g/mL throughout the  
440 DC:T cell co-culture period (16). After 6 days of co-culture, cells were stained for  
441 surface expression of CD4 or CD8, CD3, CD38, and HLA-DR. Proliferation, by CTV  
442 dilution, and T cell activation (CD38+HLA-DR+) were assessed by flow cytometry (42).

443

444 **Multiplex bead array.** Cytokine analysis was performed on supernatants using a  
445 human 25-plex panel (ThermoScientific) and a custom 2-plex panel with human IFN $\beta$   
446 and IFN $\alpha$  simplex kits (eBioscience) as described previously (32). Cytokines analyzed  
447 included: IFN- $\alpha$ , IFN $\beta$ , GM-CSF, TNF- $\alpha$ , IL-4, IL-6, MIP-1 $\alpha$ , IL-8, IL-15, IL-2R, IP-10,  
448 MIP-1 $\beta$ , Eotaxin, RANTES, MIG, IL-1RA, IL-12 (p40/p70) IL-13, IFN- $\gamma$ , MCP-1, IL-7, IL-  
449 17, IL-10, IL-5, IL-2, and IL-1 $\beta$ .

450

451 **Statistics.** All statistical analysis was performed using GraphPad Prism version 6  
452 software. The number of donors varied by experiment and is indicated within the figure  
453 legends. Statistical significance was determined as  $P < 0.05$  using a Kruskal-Wallis test  
454 (when comparing more than two groups lacking paired measurements), a Wilcoxon test  
455 (when comparing two groups with paired measurements), or a two-way ANOVA (when  
456 comparing two groups across multiple independent variables). All comparisons were  
457 made between treatment or infection conditions with a time point matched, uninfected  
458 and untreated control.

459 **Funding Information.**

460 This work was funded in part by National Institutes of Health grants U19AI083019  
461 (M.S.S), R56AI110516 (M.S.S) and R21AI113485 (M.S.S.), 2U19AI090023 (B.P),  
462 5R37DK057665 (B.P), 5R37AI048638 (B.P), 2U19AI057266 (B.P), ORIP/OD  
463 P51OD011132 (M.S.S, B.P), Emory University Department of Pediatrics Junior Faculty  
464 Focused Award (M.S.S), Children's Healthcare of Atlanta, Emory Vaccine Center, and  
465 The Georgia Research Alliance (M.S.S). The funders had no role in study design, data  
466 collection and analysis, decision to publish, or preparation of the manuscript.

467 **Acknowledgements.**

468 We thank the Children's Healthcare of Atlanta and Emory University Pediatric Flow  
469 Cytometry Core for providing access to flow cytometry, ImageStream, and Luminex  
470 systems, and the Yerkes Genomics Core for performing RNA sequencing.

## 471 References

- 472 1. Lindsey NP, Lehman JA, Staples JE, Fischer M. 2015. West Nile Virus and Other  
473 Nationally Notifiable Arboviral Diseases - United States, 2014. *MMWR Morb Mortal*  
474 *Wkly Rep* 64:929-34.
- 475 2. Chancey C, Grinev A, Volkova E, Rios M. 2015. The global ecology and epidemiology  
476 of West Nile virus. *Biomed Res Int* 2015:376230.
- 477 3. Patel H, Sander B, Nelder MP. 2015. Long-term sequelae of West Nile virus-related  
478 illness: a systematic review. *Lancet Infect Dis* 15:951-9.
- 479 4. Suthar MS, Diamond MS, Gale M, Jr. 2013. West Nile virus infection and immunity.  
480 *Nat Rev Microbiol* 11:115-28.
- 481 5. Schmid MA, Harris E. 2014. Monocyte recruitment to the dermis and differentiation  
482 to dendritic cells increases the targets for dengue virus replication. *PLoS Pathog*  
483 10:e1004541.
- 484 6. Lim PY, Behr MJ, Chadwick CM, Shi PY, Bernard KA. 2011. Keratinocytes are cell  
485 targets of West Nile virus in vivo. *J Virol* 85:5197-201.
- 486 7. Pinto AK, Ramos HJ, Wu X, Aggarwal S, Shrestha B, Gorman M, Kim KY, Suthar MS,  
487 Atkinson JP, Gale M, Jr., Diamond MS. 2014. Deficient IFN signaling by myeloid cells  
488 leads to MAVS-dependent virus-induced sepsis. *PLoS Pathog* 10:e1004086.
- 489 8. Lazear HM, Lancaster A, Wilkins C, Suthar MS, Huang A, Vick SC, Clepper L, Thackray  
490 L, Brassil MM, Virgin HW, Nikolich-Zugich J, Moses AV, Gale M, Jr., Fruh K, Diamond  
491 MS. 2013. IRF-3, IRF-5, and IRF-7 coordinately regulate the type I IFN response in  
492 myeloid dendritic cells downstream of MAVS signaling. *PLoS Pathog* 9:e1003118.
- 493 9. Errett JS, Suthar MS, McMillan A, Diamond MS, Gale M, Jr. 2013. The essential,  
494 nonredundant roles of RIG-I and MDA5 in detecting and controlling West Nile virus  
495 infection. *J Virol* 87:11416-25.
- 496 10. Suthar MS, Ma DY, Thomas S, Lund JM, Zhang N, Daffis S, Rudensky AY, Bevan MJ,  
497 Clark EA, Kaja MK, Diamond MS, Gale M, Jr. 2010. IPS-1 is essential for the control of  
498 West Nile virus infection and immunity. *PLoS Pathog* 6:e1000757.
- 499 11. Hildner K, Edelson BT, Purtha WE, Diamond M, Matsushita H, Kohyama M, Calderon  
500 B, Schraml BU, Unanue ER, Diamond MS, Schreiber RD, Murphy TL, Murphy KM.  
501 2008. Batf3 deficiency reveals a critical role for CD8alpha+ dendritic cells in  
502 cytotoxic T cell immunity. *Science* 322:1097-100.
- 503 12. Lanteri MC, Diamond MS, Law JP, Chew GM, Wu S, Inglis HC, Wong D, Busch MP,  
504 Norris PJ, Ndhlovu LC. 2014. Increased frequency of Tim-3 expressing T cells is  
505 associated with symptomatic West Nile virus infection. *PLoS One* 9:e92134.
- 506 13. James EA, Gates TJ, LaFond RE, Yamamoto S, Ni C, Mai D, Gersuk VH, O'Brien K,  
507 Nguyen QA, Zeitner B, Lanteri MC, Norris PJ, Chaussabel D, Malhotra U, Kwok WW.  
508 2016. Neuroinvasive West Nile Infection Elicits Elevated and Atypically Polarized T  
509 Cell Responses That Promote a Pathogenic Outcome. *PLoS Pathog* 12:e1005375.
- 510 14. Lanteri MC, O'Brien KM, Purtha WE, Cameron MJ, Lund JM, Owen RE, Heitman JW,  
511 Custer B, Hirschhorn DF, Tobler LH, Kiely N, Prince HE, Ndhlovu LC, Nixon DF,  
512 Kamel HT, Kelvin DJ, Busch MP, Rudensky AY, Diamond MS, Norris PJ. 2009. Tregs  
513 control the development of symptomatic West Nile virus infection in humans and  
514 mice. *J Clin Invest* 119:3266-77.



- 515 15. Suthar MS, Brassil MM, Blahnik G, Gale M, Jr. 2012. Infectious clones of novel lineage  
516 1 and lineage 2 West Nile virus strains WNV-TX02 and WNV-Madagascar. *J Virol*  
517 86:7704-9.
- 518 16. Oliphant T, Engle M, Nybakken GE, Doane C, Johnson S, Huang L, Gorlatov S,  
519 Mehlhop E, Marri A, Chung KM, Ebel GD, Kramer LD, Fremont DH, Diamond MS.  
520 2005. Development of a humanized monoclonal antibody with therapeutic potential  
521 against West Nile virus. *Nat Med* 11:522-30.
- 522 17. Keller BC, Fredericksen BL, Samuel MA, Mock RE, Mason PW, Diamond MS, Gale M,  
523 Jr. 2006. Resistance to alpha/beta interferon is a determinant of West Nile virus  
524 replication fitness and virulence. *J Virol* 80:9424-34.
- 525 18. Samuel MA, Diamond MS. 2005. Alpha/beta interferon protects against lethal West  
526 Nile virus infection by restricting cellular tropism and enhancing neuronal survival.  
527 *J Virol* 79:13350-61.
- 528 19. Saito T, Owen DM, Jiang F, Marcotrigiano J, Gale M, Jr. 2008. Innate immunity  
529 induced by composition-dependent RIG-I recognition of hepatitis C virus RNA.  
530 *Nature* 454:523-7.
- 531 20. Kato H, Takeuchi O, Mikamo-Satoh E, Hirai R, Kawai T, Matsushita K, Hiiragi A,  
532 Dermody TS, Fujita T, Akira S. 2008. Length-dependent recognition of double-  
533 stranded ribonucleic acids by retinoic acid-inducible gene-I and melanoma  
534 differentiation-associated gene 5. *J Exp Med* 205:1601-10.
- 535 21. Kim YE, Ahn JH. 2015. Positive role of promyelocytic leukemia protein in type I  
536 interferon response and its regulation by human cytomegalovirus. *PLoS Pathog*  
537 11:e1004785.
- 538 22. Bowen JR, Ferris MT, Suthar MS. 2016. Systems biology: A tool for charting the  
539 antiviral landscape. *Virus Res* 218:2-9.
- 540 23. Langfelder P, Horvath S. 2008. WGCNA: an R package for weighted correlation  
541 network analysis. *BMC Bioinformatics* 9:559.
- 542 24. Seder RA, Paul WE, Davis MM, Fazekas de St Groth B. 1992. The presence of  
543 interleukin 4 during in vitro priming determines the lymphokine-producing  
544 potential of CD4+ T cells from T cell receptor transgenic mice. *J Exp Med* 176:1091-  
545 8.
- 546 25. Heufler C, Koch F, Stanzl U, Topar G, Wysocka M, Trinchieri G, Enk A, Steinman RM,  
547 Romani N, Schuler G. 1996. Interleukin-12 is produced by dendritic cells and  
548 mediates T helper 1 development as well as interferon-gamma production by T  
549 helper 1 cells. *Eur J Immunol* 26:659-68.
- 550 26. Querec T, Bennouna S, Alkan S, Laouar Y, Gorden K, Flavell R, Akira S, Ahmed R,  
551 Pulendran B. 2006. Yellow fever vaccine YF-17D activates multiple dendritic cell  
552 subsets via TLR2, 7, 8, and 9 to stimulate polyvalent immunity. *J Exp Med* 203:413-  
553 24.
- 554 27. de Saint-Vis B, Vincent J, Vandenabeele S, Vanbervliet B, Pin JJ, Ait-Yahia S, Patel S,  
555 Mattei MG, Banchereau J, Zurawski S, Davoust J, Caux C, Lebecque S. 1998. A Novel  
556 Lysosome-Associated Membrane Glycoprotein, DC-LAMP, Induced upon DC  
557 Maturation, Is Transiently Expressed in MHC Class II Compartment. *Immunity*  
558 9:325-336.

- 559 28. Kovats S, Turner S, Simmons A, Powe T, Chakravarty E, Alberola-Illa J. 2016. West  
560 Nile virus-infected human dendritic cells fail to fully activate invariant natural killer  
561 T cells. *Clin Exp Immunol* 186:214-226.
- 562 29. Akondy RS, Monson ND, Miller JD, Edupuganti S, Teuwen D, Wu H, Quyyumi F, Garg  
563 S, Altman JD, Del Rio C, Keyserling HL, Ploss A, Rice CM, Orenstein WA, Mulligan MJ,  
564 Ahmed R. 2009. The yellow fever virus vaccine induces a broad and polyfunctional  
565 human memory CD8+ T cell response. *J Immunol* 183:7919-30.
- 566 30. Suthar MS, Brassil MM, Blahnik G, McMillan A, Ramos HJ, Proll SC, Belisle SE, Katze  
567 MG, Gale M, Jr. 2013. A systems biology approach reveals that tissue tropism to West  
568 Nile virus is regulated by antiviral genes and innate immune cellular processes.  
569 *PLoS Pathog* 9:e1003168.
- 570 31. Silva MC, Guerrero-Plata A, Gilfoy FD, Garofalo RP, Mason PW. 2007. Differential  
571 activation of human monocyte-derived and plasmacytoid dendritic cells by West  
572 Nile virus generated in different host cells. *J Virol* 81:13640-8.
- 573 32. Bowen JR, Quicke KM, Maddur MS, O'Neal JT, McDonald CE, Fedorova NB, Puri V,  
574 Shabman RS, Pulendran B, Suthar MS. 2017. Zika Virus Antagonizes Type I  
575 Interferon Responses during Infection of Human Dendritic Cells. *PLoS Pathogens*  
576 13:e1006164.
- 577 33. Rodriguez-Madoz JR, Bernal-Rubio D, Kaminski D, Boyd K, Fernandez-Sesma A.  
578 2010. Dengue virus inhibits the production of type I interferon in primary human  
579 dendritic cells. *J Virol* 84:4845-50.
- 580 34. Olganier D, Peri S, Steel C, van Montfoort N, Chiang C, Beljanski V, Slifker M, He Z,  
581 Nichols CN, Lin R, Balachandran S, Hiscott J. 2014. Cellular oxidative stress response  
582 controls the antiviral and apoptotic programs in dengue virus-infected dendritic  
583 cells. *PLoS Pathog* 10:e1004566.
- 584 35. Ferris MT, Aylor DL, Bottomly D, Whitmore AC, Aicher LD, Bell TA, Bradel-  
585 Tretheway B, Bryan JT, Buus RJ, Gralinski LE, Haagmans BL, McMillan L, Miller DR,  
586 Rosenzweig E, Valdar W, Wang J, Churchill GA, Threadgill DW, McWeeney SK, Katze  
587 MG, Pardo-Manuel de Villena F, Baric RS, Heise MT. 2013. Modeling host genetic  
588 regulation of influenza pathogenesis in the collaborative cross. *PLoS Pathog*  
589 9:e1003196.
- 590 36. Graham JB, Thomas S, Swarts J, McMillan AA, Ferris MT, Suthar MS, Treuting PM,  
591 Ireton R, Gale M, Jr., Lund JM. 2015. Genetic diversity in the collaborative cross  
592 model recapitulates human West Nile virus disease outcomes. *MBio* 6:e00493-15.
- 593 37. Green R, Wilkins C, Thomas S, Sekine A, Ireton RC, Ferris MT, Hendrick DM, Voss K,  
594 de Villena FP, Baric R, Heise M, Gale M, Jr. 2016. Identifying protective host gene  
595 expression signatures within the spleen during West Nile virus infection in the  
596 collaborative cross model. *Genom Data* 10:114-117.
- 597 38. Green R, Wilkins C, Thomas S, Sekine A, Ireton RC, Ferris MT, Hendrick DM, Voss K,  
598 Pardo-Manuel de Villena F, Baric RS, Heise MT, Gale M, Jr. 2016. Transcriptional  
599 profiles of WNV neurovirulence in a genetically diverse Collaborative Cross  
600 population. *Genom Data* 10:137-140.
- 601 39. Lanteri MC, Heitman JW, Owen RE, Busch T, Geftter N, Kiely N, Kamel HT, Tobler LH,  
602 Busch MP, Norris PJ. 2008. Comprehensive analysis of west nile virus-specific T cell  
603 responses in humans. *J Infect Dis* 197:1296-306.

- 604 40. Lim SM, Koraka P, Osterhaus AD, Martina BE. 2013. Development of a strand-  
605 specific real-time qRT-PCR for the accurate detection and quantitation of West Nile  
606 virus RNA. *J Virol Methods* 194:146-53.
- 607 41. Love MI, Huber W, Anders S. 2014. Moderated estimation of fold change and  
608 dispersion for RNA-seq data with DESeq2. *Genome Biol* 15:550.
- 609 42. McElroy AK, Akondy RS, Davis CW, Ellebedy AH, Mehta AK, Kraft CS, Lyon GM,  
610 Ribner BS, Varkey J, Sidney J, Sette A, Campbell S, Stroher U, Damon I, Nichol ST,  
611 Spiropoulou CF, Ahmed R. 2015. Human Ebola virus infection results in substantial  
612 immune activation. *Proc Natl Acad Sci U S A* 112:4719-24.
- 613

614 **Figure Captions**

615 **Fig 1. WNV productively infects human moDCs.** moDCs were infected with WNV or  
616 UV-inactivated WNV (UV-WNV) at MOI 10 (as determined on Vero cells) and analyzed  
617 at indicated hours post-infection. **(A)** Viral RNA as quantitated in cell lysates by RT-  
618 qPCR. Shown as  $\log_2$  normalized expression after normalization to *GAPDH*. Data is  
619 shown for each donor with the mean (n=5-11 donors). **(B)** Infectious virus release into  
620 the supernatant as determined by a viral plaque assay on Vero cells. Data is shown for  
621 each donor with the mean (n=4-17 donors). PFU, plaque-forming unit. **(C)** Percent E  
622 protein+ cells as determine by flow cytometry (Left panel). Data is shown for each donor  
623 with the mean (n=5-31 donors). **(D)** ImageStream analysis of WNV-infected moDCs  
624 labeled for viral E protein at 24hpi **(E)** Percent viable cells. Data is shown for each donor  
625 with the mean (n=5 donors).

626

627 **Fig 2. Innate immune signaling restricts WNV replication.** **(A)** Experimental  
628 overview. moDCs were infected with WNV at MOI 10 (as determined on Vero cells) for  
629 1hr and then treated with RIG-I agonist (100ng/1e6 cells), MDA5 agonist (100ng/1e6  
630 cells), IFN $\beta$  (1000 IU/mL), or left untreated ("WNV"). **(B)** Infectious virus release into the  
631 supernatant (left panel) or viral E protein staining (right panel) was assessed at 24hpi.  
632 Data is represented as percent inhibition and shown for each donor with the mean (n=  
633 5-6 donors). **(C)** moDCs treated as in B were incubated with or without anti-IFNAR2  
634 (5 $\mu$ g/mL). For A and C, percent inhibition was calculated as:  $(1 - [\text{WNV} + \text{agonist}] /$   
635  $[\text{WNV alone}]) * 100$ . Dashed line indicates 100% inhibition, or complete block of viral

636 infection. Data is shown for each donor with the mean (n= 3 donors). Statistical  
637 significance was determined as  $P < 0.05$  using a Kruskal-Wallis test.

638

639 **Fig 3. (A)** Overview of systems biology approach used in this study. **(B)** Topologic  
640 overlap matrix showing enriched modules defined by WGCNA following 12 hr treatment  
641 with RIG-I agonist (100ng/1e6 cells), MDA5 agonist (100ng/1e6 cells), or IFN $\beta$  (1000  
642 IU/mL). Functional annotation was performed using the DAVID Bioinformatics Resource  
643 version 6.8, with the top enriched biological process shown. **(C)** Heatmap of all module  
644 5 differentially expressed genes with the  $\log_2$  normalized fold change relative to  
645 uninfected, untreated cells shown. Genes that did not reach the significance threshold  
646 are depicted in black color. **(D)** Top enriched MetaCore canonical pathways of module 5  
647 differentially expressed genes relative to uninfected and untreated cells (>2-fold change,  
648  $p < 0.01$ ). Node size corresponds with the pathway enrichment significance score ( $-\log_{10}$   
649 p value) for each indicated treatment condition.

650

651 **Fig 4. WNV induces robust antiviral and type I IFN responses.** Messenger RNA  
652 sequencing was performed on moDCs generated from 5 donors after RIG-I agonist  
653 (100ng/1e6 cells for 12hrs), high MW poly(I:C) MDA5 agonist (100 ng/1e6 cells), or  
654 IFN $\beta$  (100 IU/mL) treatment or WNV infection (MOI 10; 12 and 24hpi). **(A)** Heatmap of  
655 differentially expressed genes (DEGs) corresponding to antiviral transcription factors,  
656 innate immune sensors, and antiviral effector genes. Genes that did not reach the  
657 significance threshold are depicted in black color. **(B)** Heatmap of DEGs corresponding  
658 to type I IFN responses. For all heatmaps, the  $\log_2$  normalized fold change relative to

659 uninfected, untreated cells is shown (>2-fold change, significance of  $p < 0.01$ ). Genes  
660 that did not reach the significance threshold are depicted in black color. Each column  
661 within a treatment condition is marked by a unique color and represents a different  
662 donor (n= 5 donors). **(C)** Secretion of IFN $\alpha$  and IFN  $\beta$  proteins into the supernatant  
663 following RIG-I agonist treatment (100ng/1e6 cells), infection with UV-inactivated WNV  
664 (MOI 10, "UV-WNV"), or infection with replication competent WNV (MOI 10, "WNV").  
665 Data is shown for each donor with the mean (n= 4-11 donors). Statistical significance  
666 was determined as  $P < 0.05$  using a Kruskal-Wallis test.

667

668 **Fig 5. WNV infected DCs do not generate robust proinflammatory cytokine and**  
669 **chemokine responses. (A)** Heatmap of genes involved in inflammatory cytokine  
670 responses and chemotaxis. The  $\log_2$  normalized fold change relative to uninfected,  
671 untreated cells is shown (>2-fold change, significance of  $p < 0.01$ ). Genes that did not  
672 reach the significance threshold are depicted in black color. Each column within a  
673 treatment condition is marked by a unique color and represents a different donor (n= 5  
674 donors). **(B)** Secretion of inflammatory cytokines, T cell modulatory cytokines, and  
675 chemokines were assessed by multiplex bead array following RIG-I agonist treatment  
676 (100ng/1e6 cells), infection with UV-inactivated WNV (MOI 10, "UV-WNV"), or infection  
677 with replication competent WNV (MOI 10, "WNV"). Responses were assessed at 24hr  
678 following treatment or infection. Data for each donor is shown with the mean (n=4-7  
679 donors). Statistical significance was determined as  $P < 0.05$  using a Kruskal-Wallis test.  
680

681 **Fig 6. WNV-infected DCs fail to increase expression of molecules involved in**  
682 **antigen presentation and T cell co-stimulation. (A)** Heatmap of genes involved in  
683 antigen processing and presentation or T cell co-signaling. The log<sub>2</sub> normalized fold  
684 change relative to uninfected, untreated cells is shown (>2-fold change, significance of  
685 p<0.01). Genes that did not reach the significance threshold are depicted in black color.  
686 Each column within a treatment condition is marked by a unique color and represents a  
687 different donor (n= 5 donors). **(B)** Cell surface expression of CD80, CD86, CD40, or  
688 MHC II was quantitated by flow cytometry following RIG-I agonist treatment (100ng/1e6  
689 cells), infection with UV-inactivated WNV (MOI 10, “UV-WNV”), or infection with  
690 replication competent WNV (MOI 10, “WNV”). Responses were assessed at 24hr and  
691 48hr following treatment or infection. **(C)** Cell surface expression of CD80, CD86, CD40,  
692 or MHC II was quantitated by flow cytometry following infection with increasing MOIs of  
693 WNV at 24 hpi (MOI 0.1, 1, 10, and 100). For (B) and (C), WNV-infected moDCs were  
694 labeled for viral E protein and data is shown for the E protein+ population. Data for each  
695 donor is shown as median fluorescence intensity (MFI) with the mean (n=3-5 donors).  
696 Statistical significance was determined as P < 0.05 using a Kruskal-Wallis test.

697

698 **Fig 7. WNV-infected DCs are compromised in T cell proliferation.** moDCs were left  
699 uninfected or infected with WNV (MOI 10) for 24hrs. Allogeneic CD4 or CD8 T cells  
700 were labeled with CellTrace violet (CTV) and incubated with uninfected or WNV infected  
701 moDCs at the indicated DC:T cell ratios in the presence of an anti-E16 WNV blocking  
702 antibody to limit spreading infection (5µg/mL) for 6 days. **(A)** The percentage of cells  
703 double positive for the T cell activation markers CD38 and HLA-DR on day 6 of

704 allogeneic co-culture. **(B)** The percentage of cells that had proliferated by day 6 of  
705 allogeneic co-culture. Percent proliferation was defined as any cell that diluted CTV as  
706 compared to a “no DC, T cell only control”. Statistical significance was determined as P  
707 < 0.05 using a two-way ANOVA analysis.

708

709



# Figure 1

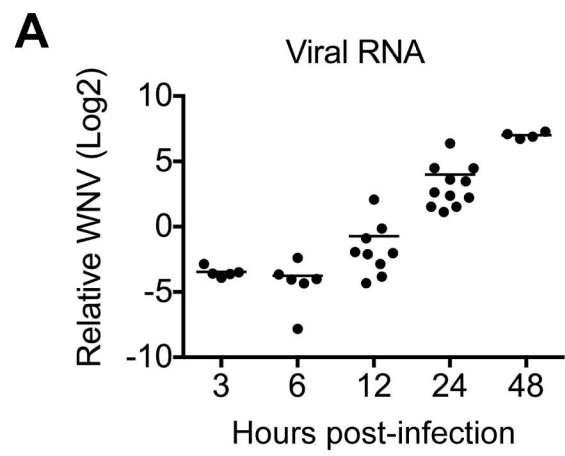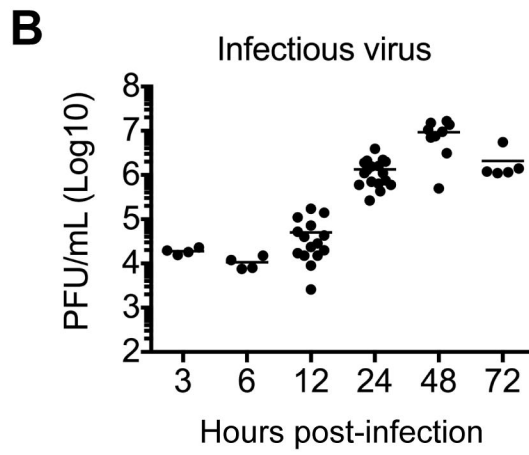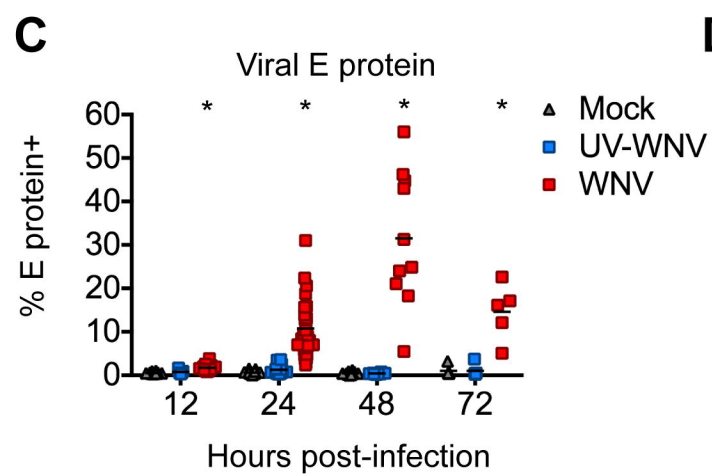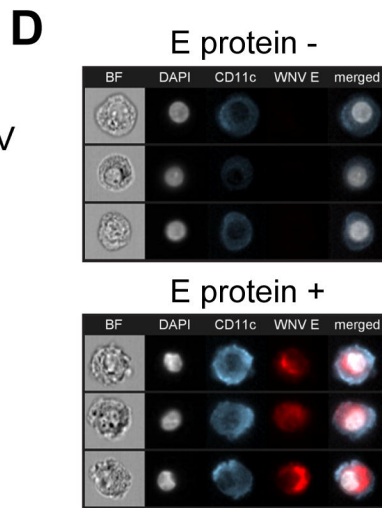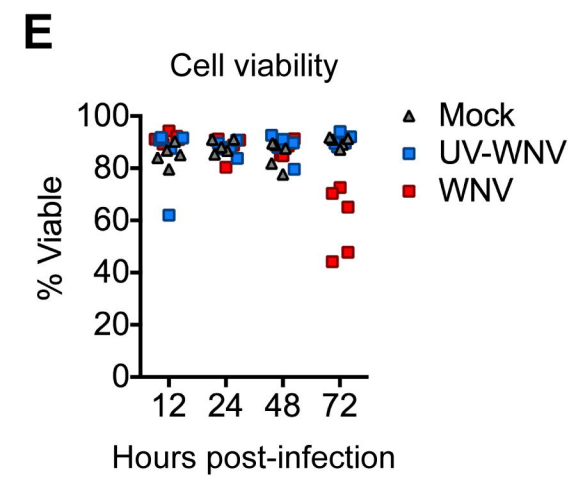

## Figure 2

**A**

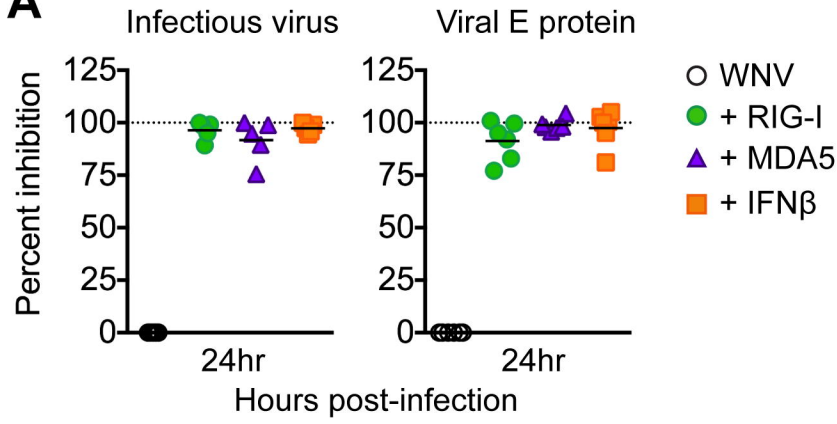

**B**

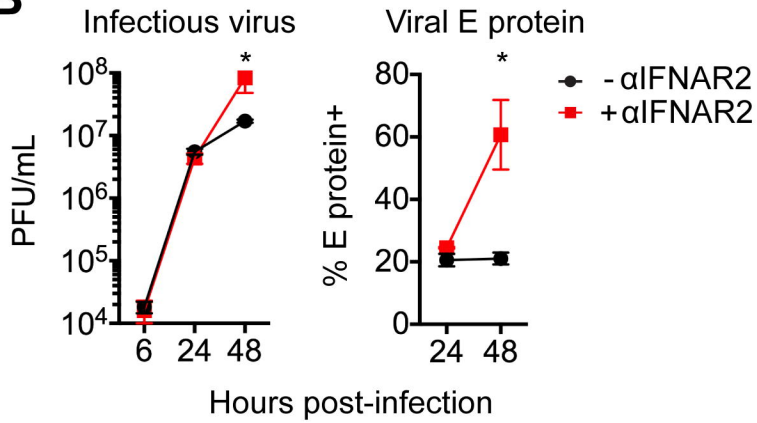

**C**

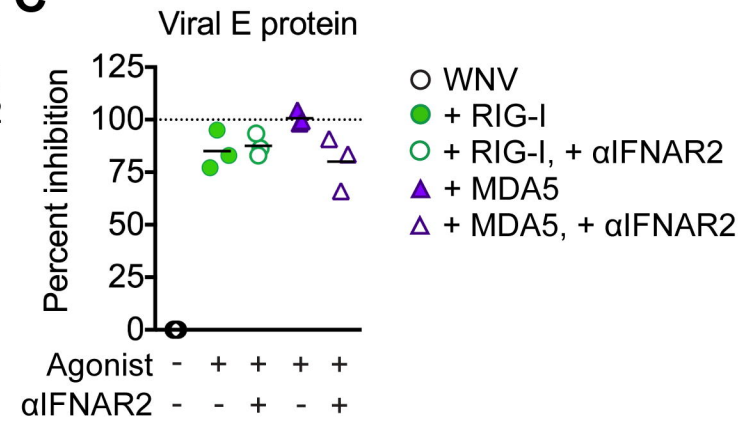

# Figure 3

**A**

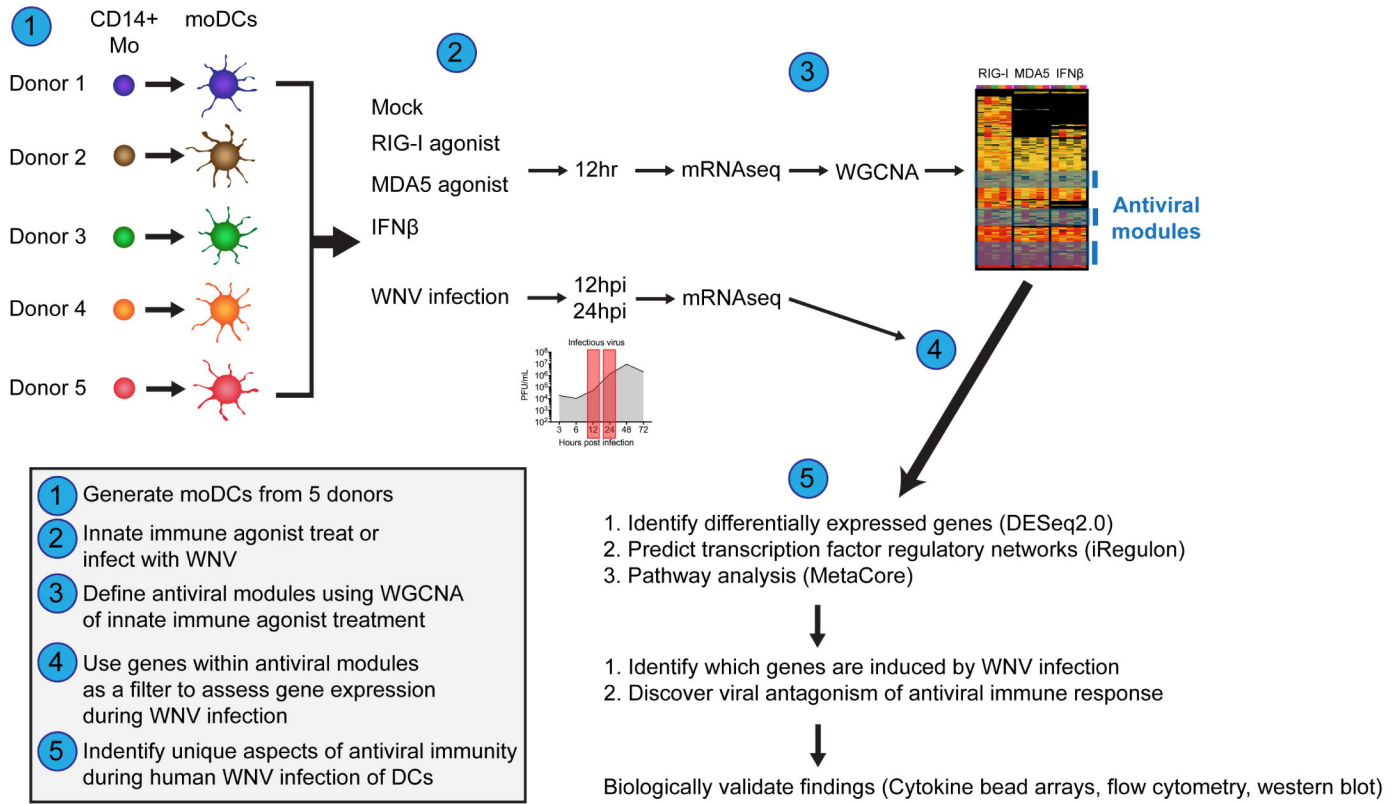

**B**

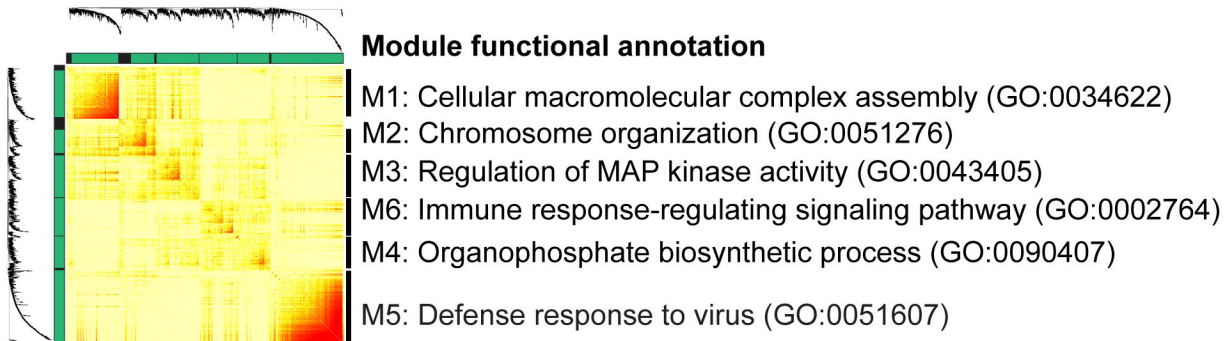

**C**

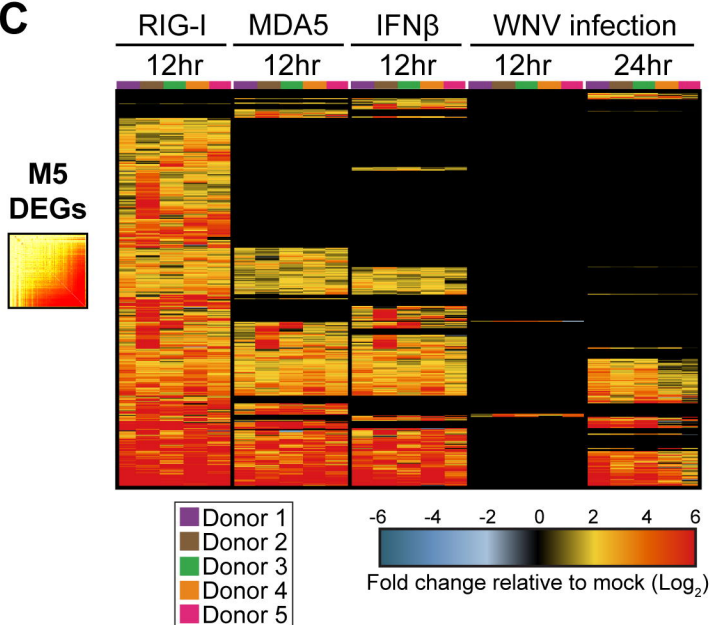

**D**

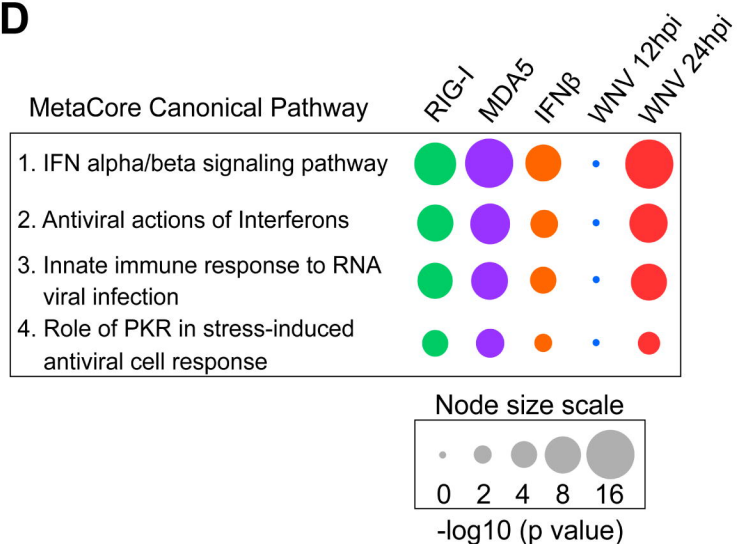

# Figure 4

**A**

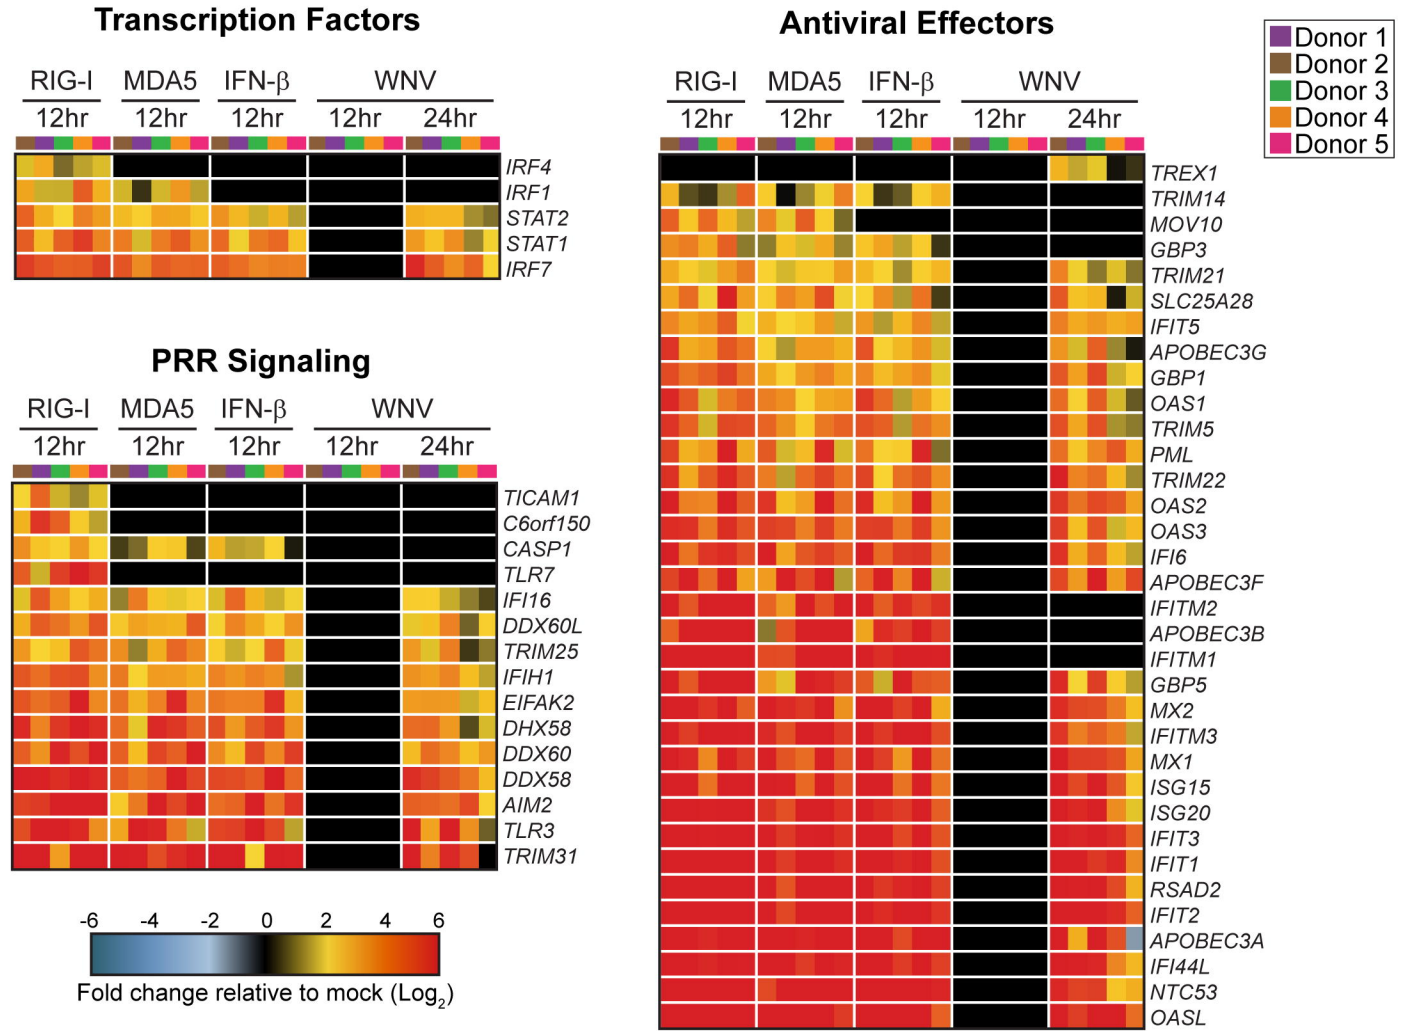

**B**

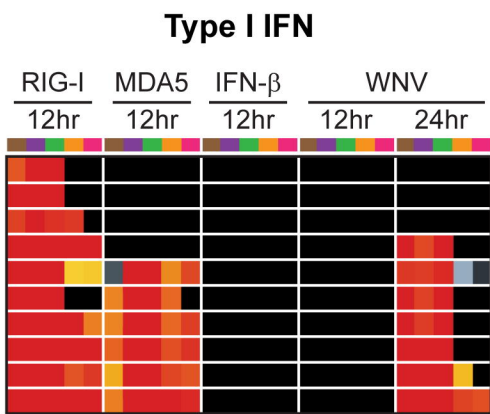

**C**

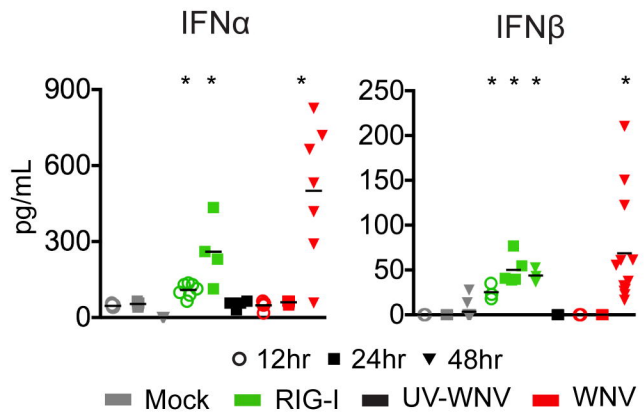

# Figure 5

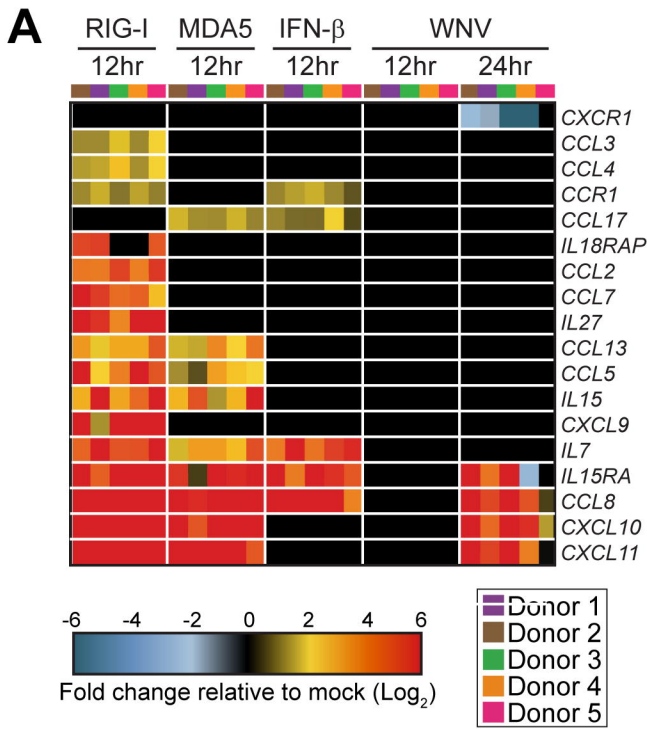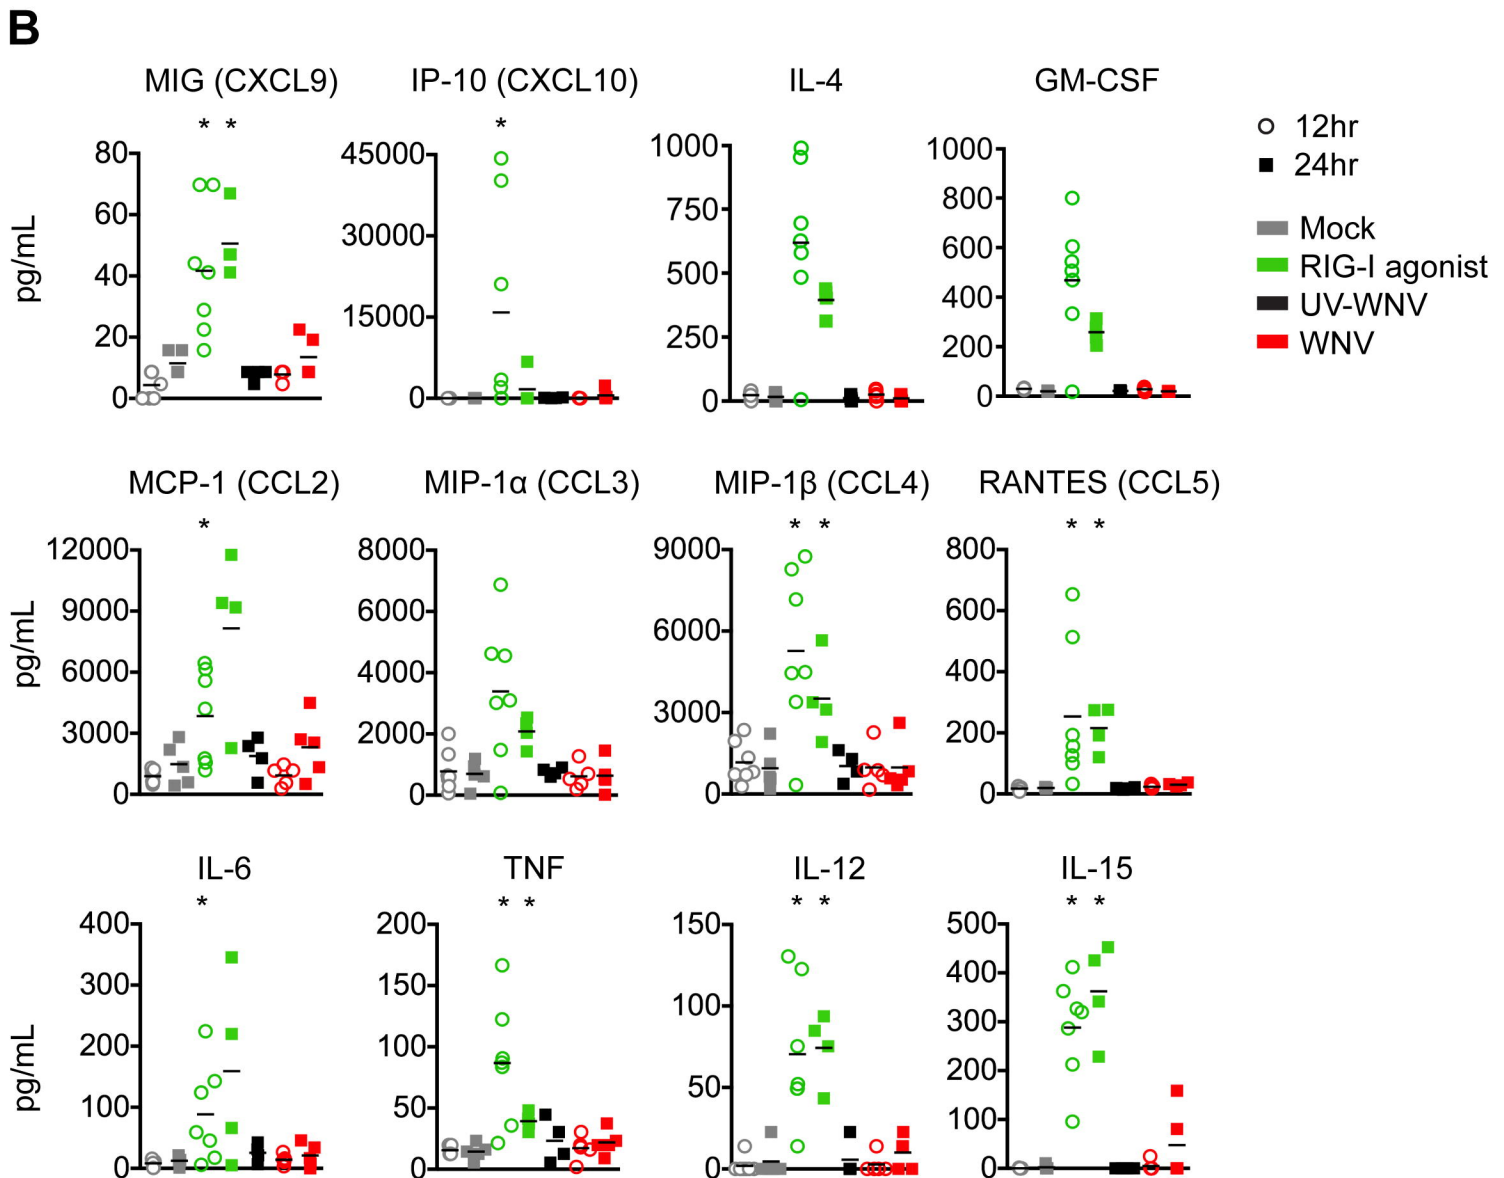

# Figure 6

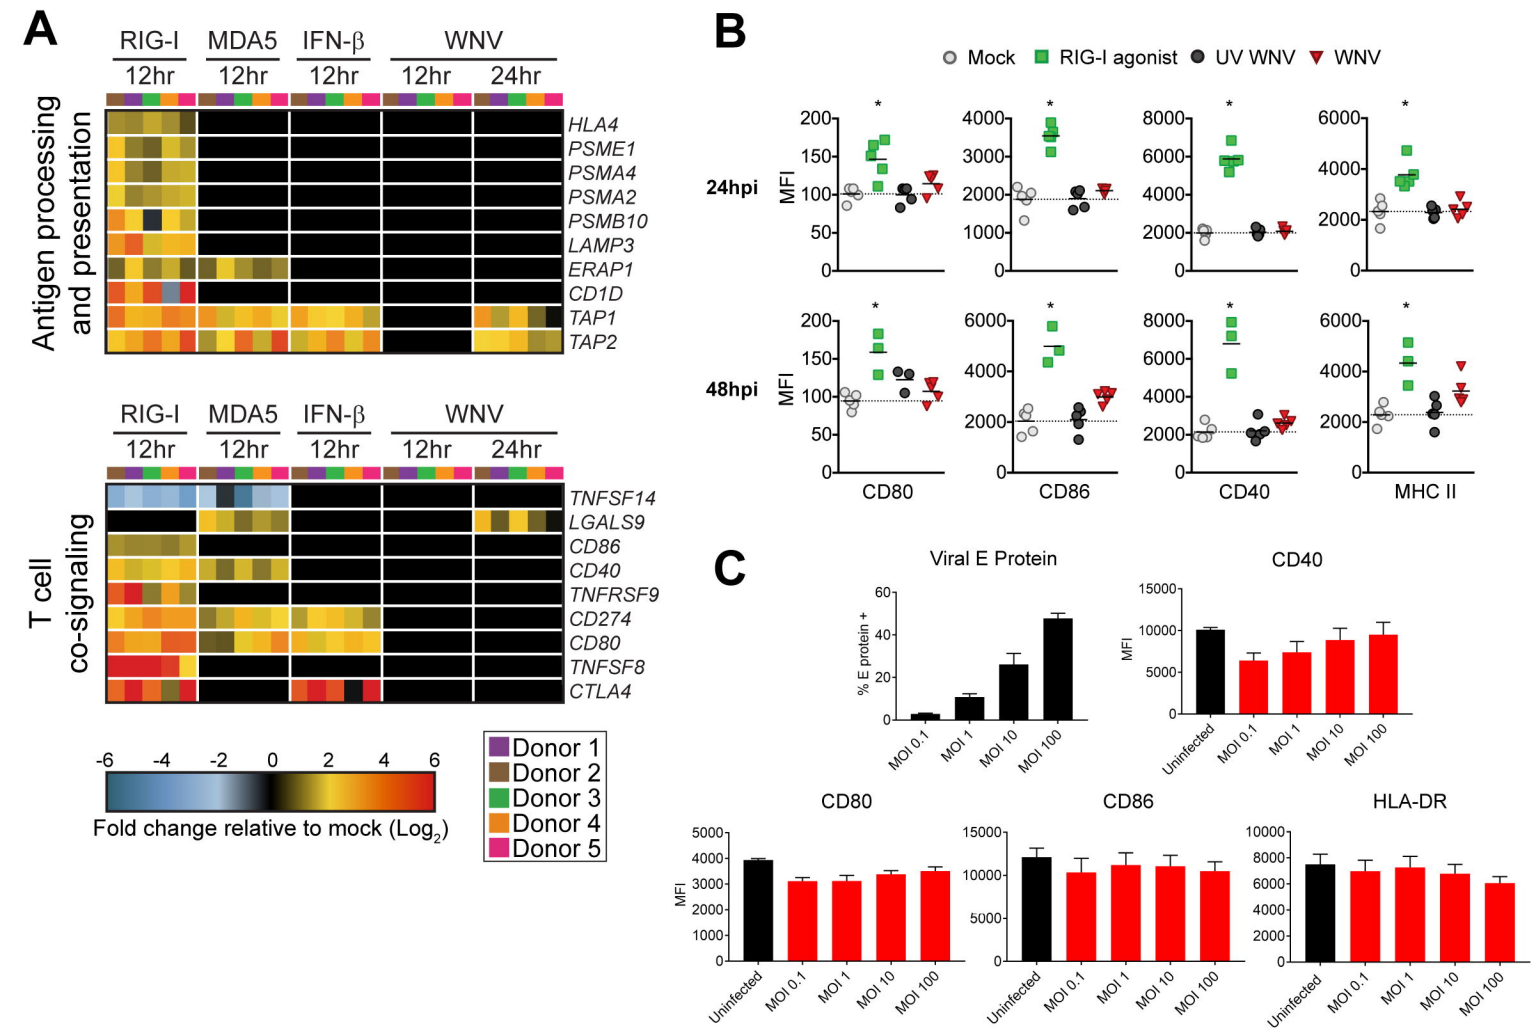

**A**

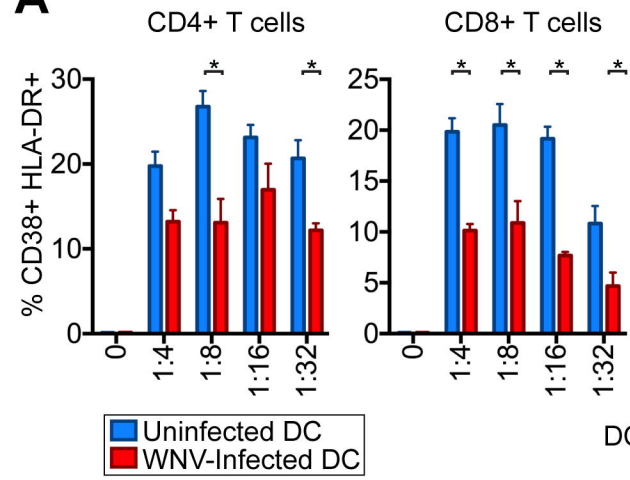

**B**

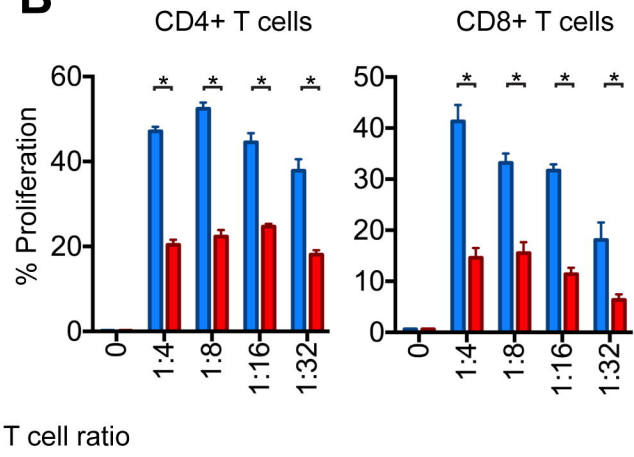

Source: http://biorxiv.org/content/10.1101/602839v1.full.pdf
